# Supplementary material for: A Preliminary Report on the Effects of Daridorexant in Patients with Comorbid Insomnia and Substance Use Disorders
Source: MDPI journal article supplement (doi:10.3390/ph18030378), 2025-03-06
Supplement: s1 [file s1]

**Supplementary Table S1.** Changes in sleep measures at different time-points by age, gender, psychiatric comorbidity, anxiety and depression symptoms and overall clinical severity as covariates.

| ISI                             | F    | <i>p</i>    |
|---------------------------------|------|-------------|
| <i>Within Subjects Effects</i>  |      |             |
| <b>Time</b>                     | 7.86 | <b>.002</b> |
| <b>Time * Age</b>               | 0.17 | .841        |
| <b>Time * Gender</b>            | 0.27 | .767        |
| <b>Time * Group<sup>1</sup></b> | 1.04 | .365        |
| <b>Time * Group<sup>2</sup></b> | 0.26 | .772        |
| <b>Time * Group<sup>3</sup></b> | 0.91 | .416        |
| <b>Time * Group<sup>4</sup></b> | 2.68 | .085        |
| <i>Between Subjects Effects</i> |      |             |
| <b>Age</b>                      | 0.05 | .834        |
| <b>Gender</b>                   | 3.31 | .089        |
| <b>Group<sup>1</sup></b>        | 2.52 | .133        |
| <b>Group<sup>2</sup></b>        | 0.89 | .360        |
| <b>Group<sup>3</sup></b>        | 1.01 | .333        |
| <b>Group<sup>4</sup></b>        | 3.83 | .069        |
| <b>sTST</b>                     |      |             |
| <i>Within Subjects Effects</i>  |      |             |
| <b>Time</b>                     | 6.22 | <b>.006</b> |
| <b>Time * Age</b>               | 0.47 | .631        |
| <b>Time * Gender</b>            | 3.15 | .058        |
| <b>Time * Group<sup>1</sup></b> | 1.47 | .247        |
| <b>Time * Group<sup>2</sup></b> | 0.46 | .634        |
| <b>Time * Group<sup>3</sup></b> | 1.63 | .213        |
| <b>Time * Group<sup>4</sup></b> | 3.03 | .064        |
| <i>Between Subjects Effects</i> |      |             |
| <b>Age</b>                      | 0.72 | .413        |
| <b>Gender</b>                   | 0.04 | .840        |
| <b>Group<sup>1</sup></b>        | 0.17 | .689        |
| <b>Group<sup>2</sup></b>        | 1.67 | .218        |
| <b>Group<sup>3</sup></b>        | 0.01 | .960        |
| <b>Group<sup>4</sup></b>        | 14.3 | <b>.002</b> |

Significant results in **bold**. Abbreviations: F, between- and within-group ratio; Group<sup>1</sup>, Psychiatry comorbidity; Group<sup>2</sup>, Anxiety symptoms (HARS scores); Group<sup>3</sup>, Depression symptoms (HDRS scores); Group<sup>4</sup>, Global clinical severity (CGI-S scores); ISI, Insomnia Severity Index; sTST, subjective Total Sleep Time; *p*, statistical significance.
