# Supplementary material for: A Preliminary Report on the Effects of Daridorexant in Patients with Comorbid Insomnia and Substance Use Disorders
Source: MDPI journal article supplement (doi:10.3390/ph18030378), 2025-03-06
Supplement: s1 [file s1]

**Supplementary Table S2.** Changes from baseline in clinical global severity, anxiety and depression symptoms, craving and quality of life by age, gender, and baseline insomnia severity as covariates.

| <b>CGI-S</b>                    | <b>F</b> | <b>p</b> |
|---------------------------------|----------|----------|
| <i>Within Subjects Effects</i>  |          |          |
| <b>Time * Age</b>               | 1.27     | .302     |
| <b>Time * Gender</b>            | 0.01     | .911     |
| <b>Time * Group<sup>1</sup></b> | 3.47     | .112     |
| <i>Between Subjects Effects</i> |          |          |
| <b>Time * Age</b>               | 1.15     | .325     |
| <b>Time * Gender</b>            | 5.74     | .054     |
| <b>Time * Group<sup>1</sup></b> | 1.62     | .250     |

| <b>HARS</b>                     |      |      |
|---------------------------------|------|------|
| <i>Within Subjects Effects</i>  |      |      |
| <b>Time * Age</b>               | 0.31 | .581 |
| <b>Time * Gender</b>            | 0.08 | .781 |
| <b>Time * Group<sup>1</sup></b> | 0.15 | .703 |
| <i>Between Subjects Effects</i> |      |      |
| <b>Time * Age</b>               | 0.42 | .524 |
| <b>Time * Gender</b>            | 0.22 | .644 |
| <b>Time * Group<sup>1</sup></b> | 3.23 | .087 |

| <b>HDRS</b>                     | <b>F</b> | <b>p</b>    |
|---------------------------------|----------|-------------|
| <i>Within Subjects Effects</i>  |          |             |
| <b>Time * Age</b>               | 0.17     | .841        |
| <b>Time * Gender</b>            | 0.27     | .767        |
| <b>Time * Group<sup>1</sup></b> | 1.04     | .365        |
| <i>Between Subjects Effects</i> |          |             |
| <b>Time * Age</b>               | 0.35     | .561        |
| <b>Time * Gender</b>            | 0.06     | .802        |
| <b>Time * Group<sup>1</sup></b> | 10.4     | <b>.004</b> |

| <b>VASc</b>                     |      |             |
|---------------------------------|------|-------------|
| <i>Within Subjects Effects</i>  |      |             |
| <b>Time * Age</b>               | 1.74 | .199        |
| <b>Time * Gender</b>            | 0.85 | .364        |
| <b>Time * Group<sup>1</sup></b> | 0.74 | .397        |
| <i>Between Subjects Effects</i> |      |             |
| <b>Age</b>                      | 0.34 | .566        |
| <b>Gender</b>                   | 0.03 | .864        |
| <b>Group<sup>1</sup></b>        | 4.34 | <b>.048</b> |

| <b>WHO-5</b>                    |      |      |
|---------------------------------|------|------|
| <i>Within Subjects Effects</i>  |      |      |
| <b>Time * Age</b>               | 0.02 | .879 |
| <b>Time * Gender</b>            | 0.02 | .881 |
| <b>Time * Group<sup>1</sup></b> | 3.13 | .091 |
| <i>Between Subjects Effects</i> |      |      |
| <b>Age</b>                      | 0.05 | .816 |
| <b>Gender</b>                   | 0.01 | .882 |
| <b>Group<sup>1</sup></b>        | 0.99 | .330 |

Significant results in **bold**. Abbreviations: CGI-S, Clinical Global Impression-Severity Index; F, between- and within-group ratio; Group<sup>1</sup>, Insomnia Severity at baseline (ISI scores); HARS, Hamilton Anxiety Rating Scale; HDRS, Hamilton Depression Rating Scale; p, statistical significance; VASc, Visual Analogue Scale for craving; WHO-5, 5-item World Health Organization Well-Being Index.
